# Supplementary material for: Comparison of owner-reported behavioral characteristics among genetically clustered breeds of dog (Canis familiaris)
Source: PubMed Central journal article supplement (PMC4683527; doi:10.1038/srep17710), 2015-12-18
Supplement: srep17710-s2.pdf [file srep17710-s2.pdf]

Supplementary Figure 2. The Breed Tree of the Cladistic Analysis for Factor 4 (Separation-related anxiety).

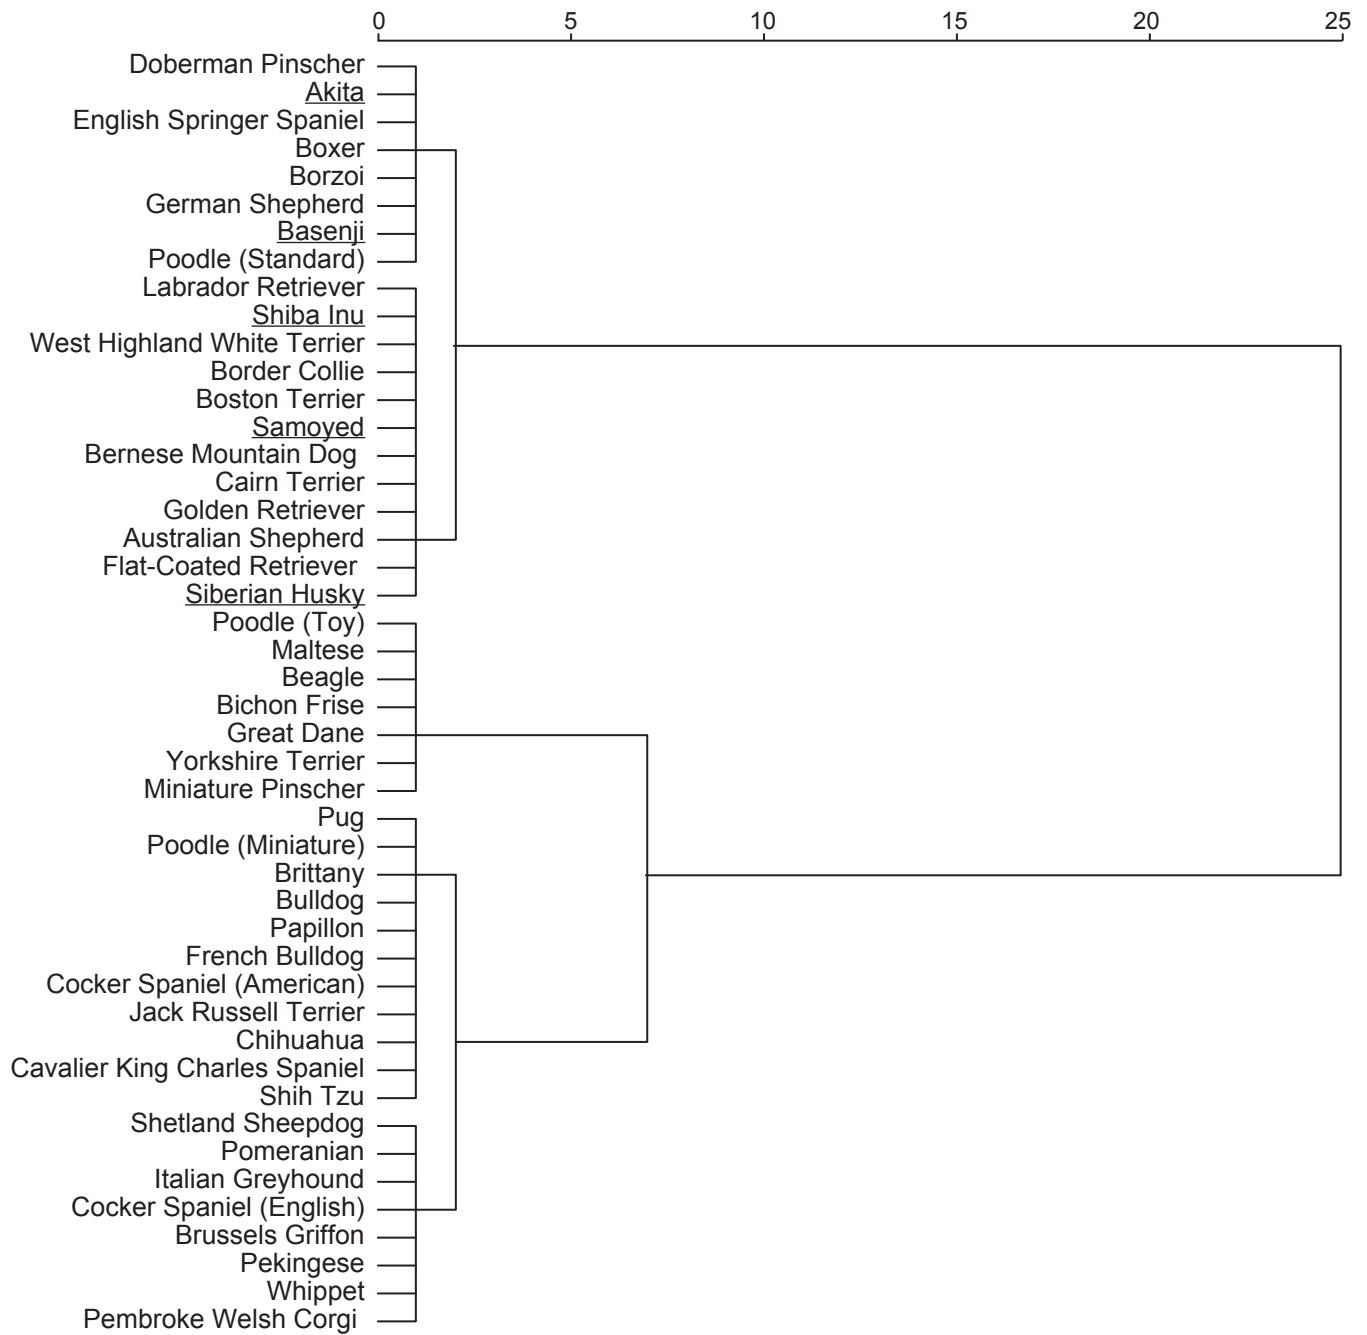

The breeds of the Ancient and spitz breed group are underlined.
