# Supplementary material for: Comparison of owner-reported behavioral characteristics among genetically clustered breeds of dog (Canis familiaris)
Source: PubMed Central journal article supplement (PMC4683527; doi:10.1038/srep17710), 2015-12-18
Supplement: srep17710-s4.pdf [file srep17710-s4.pdf]

Supplementary Table 1 The Number of each breed and sex in Japan and the United States

a. Japan

| Breed                                 | Male<br>(intact) | Male<br>(castrated) | Female<br>(intact) | Female<br>(spayed) | Total | Cumulative<br>% |
|---------------------------------------|------------------|---------------------|--------------------|--------------------|-------|-----------------|
| <b>Poodle (Toy)</b>                   | 74 (2)           | 135 (9)             | 57 (3)             | 121 (8)            | 387   | 13.11           |
| <b>Dachshund (Miniature)</b>          | 80 (11)          | 85 (10)             | 49 (8)             | 93 (13)            | 307   | 23.52           |
| <b>Shiba Inu</b>                      | 58 (16)          | 49 (16)             | 35 (6)             | 98 (26)            | 240   | 31.65           |
| <b>Chihuahua</b>                      | 32 (15)          | 69 (40)             | 34 (25)            | 55 (30)            | 190   | 38.09           |
| <b>Labrador Retriever</b>             | 13 (12)          | 30 (28)             | 15 (14)            | 30 (27)            | 88    | 41.07           |
| <b>Border Collie</b>                  | 20 (19)          | 23 (19)             | 14 (13)            | 27 (24)            | 84    | 43.92           |
| <b>Papillon</b>                       | 12 (4)           | 23 (8)              | 13 (3)             | 36 (9)             | 84    | 46.76           |
| <b>Miniature Schnauzer</b>            | 15 (10)          | 29 (20)             | 17 (13)            | 20 (17)            | 81    | 49.51           |
| <b>Pembroke Welsh Corgi</b>           | 18 (10)          | 21 (14)             | 11 (7)             | 27 (17)            | 77    | 52.12           |
| <b>French Bulldog</b>                 | 18 (4)           | 21 (5)              | 7 (2)              | 25 (7)             | 71    | 54.52           |
| <b>Jack Russell Terrier</b>           | 15 (11)          | 25 (18)             | 6 (6)              | 23 (23)            | 69    | 56.86           |
| <b>Pomeranian</b>                     | 4 (3)            | 33 (22)             | 11 (11)            | 16 (14)            | 64    | 59.03           |
| <b>Yorkshire Terrier</b>              | 16 (10)          | 20 (13)             | 10 (10)            | 15 (13)            | 61    | 61.10           |
| <b>Shetland Sheepdog</b>              | 12 (12)          | 14 (13)             | 16 (11)            | 16 (14)            | 58    | 63.06           |
| <b>Golden Retriever</b>               | 13 (5)           | 18 (17)             | 6 (6)              | 16 (16)            | 53    | 64.86           |
| <b>Pug</b>                            | 13 (13)          | 10 (10)             | 7 (7)              | 18 (16)            | 48    | 66.49           |
| <b>Cavalier King Charles Spaniel</b>  | 6 (6)            | 13 (12)             | 4 (2)              | 23 (16)            | 46    | 68.04           |
| <b>Beagle</b>                         | 7 (7)            | 14 (14)             | 6 (5)              | 16 (16)            | 43    | 69.50           |
| <b>Maltese</b>                        | 7 (4)            | 20 (12)             | 8 (8)              | 8 (8)              | 43    | 70.96           |
| <b>Shih Tzu</b>                       | 8 (8)            | 13 (12)             | 8 (7)              | 14 (13)            | 43    | 72.42           |
| <b>Italian Greyhound</b>              | 8 (1)            | 16 (8)              | 3 (2)              | 11 (7)             | 38    | 73.70           |
| <b>Boston Terrier</b>                 | 9 (8)            | 9 (8)               | 2 (2)              | 15 (14)            | 35    | 74.89           |
| <b>Miniature Pinscher</b>             | 8 (7)            | 9 (6)               | 4 (3)              | 10 (10)            | 31    | 75.94           |
| <b>Cocker Spaniel (American)</b>      | 4 (3)            | 8 (4)               | 1 (1)              | 6 (6)              | 19    | 76.58           |
| <b>Bernese Mountain Dog</b>           | 8 (7)            | 2 (1)               | 4 (4)              | 4 (4)              | 18    | 77.19           |
| <b>Flat-Coated Retriever</b>          | 2 (2)            | 2 (2)               | 3 (1)              | 9 (3)              | 16    | 77.74           |
| <b>Poodle (Miniature)</b>             | 4 (2)            | 4 (4)               | 3 (2)              | 5 (4)              | 16    | 78.28           |
| <b>German Shepherd</b>                | 5 (4)            | 1 (1)               | 4 (3)              | 4 (2)              | 14    | 78.75           |
| <b>Bichon Frise</b>                   | 1 (1)            | 5 (4)               | 1 (1)              | 5 (4)              | 12    | 79.16           |
| <b>Poodle (Standard)</b>              | 2 (1)            | 4 (4)               | 3 (2)              | 3 (3)              | 12    | 79.57           |
| <b>Cocker Spaniel (English)</b>       | 2 (2)            | 3 (3)               | 2 (2)              | 4 (3)              | 11    | 79.94           |
| <b>West Highland White Terrier</b>    | 2 (1)            | 4 (4)               | 2 (2)              | 3 (3)              | 11    | 80.31           |
| Japanese Spitz                        | 2                | 1                   | 2                  | 5                  | 10    | 80.65           |
| Kai                                   | 4                | 2                   | 1                  | 3                  | 10    | 80.99           |
| <b>Pekingese</b>                      | 2 (1)            | 4 (3)               | 3 (3)              | 1 (1)              | 10    | 81.33           |
| <b>Akita</b>                          | 3 (2)            | 2                   | 1 (1)              | 2 (1)              | 8     | 81.60           |
| <b>Australian Shepherd</b>            | 2 (1)            | 3 (2)               | 0                  | 3 (3)              | 8     | 81.87           |
| <b>Doberman Pinscher</b>              | 2                | 3 (3)               | 0                  | 3 (3)              | 8     | 82.14           |
| <b>Siberian Husky</b>                 | 5 (1)            | 2                   | 1 (1)              | 0                  | 8     | 82.41           |
| <b>Dalmatian</b>                      | 1 (1)            | 2 (2)               | 1 (1)              | 3 (2)              | 7     | 82.65           |
| <b>Whippet</b>                        | 2 (2)            | 2 (1)               | 0                  | 3 (3)              | 7     | 82.89           |
| Miniature Bull Terrier                | 1                | 2                   | 0                  | 3                  | 6     | 83.09           |
| <b>Pointer</b>                        | 1 (1)            | 3 (1)               | 1 (1)              | 1 (1)              | 6     | 83.29           |
| <b>Basenji</b>                        | 2 (2)            | 0                   | 0                  | 3 (2)              | 5     | 83.46           |
| <b>Belgian Groenendal</b>             | 1                | 3 (1)               | 0                  | 1 (1)              | 5     | 83.63           |
| <b>Boxer</b>                          | 1 (1)            | 1 (1)               | 0                  | 3 (2)              | 5     | 83.80           |
| <b>Cairn Terrier</b>                  | 1 (1)            | 1 (1)               | 1 (1)              | 2 (1)              | 5     | 83.97           |
| Cardigan Welsh Corgi                  | 0                | 1                   | 2                  | 2                  | 5     | 84.14           |
| <b>English Setter</b>                 | 1 (1)            | 3                   | 0                  | 1 (1)              | 5     | 84.31           |
| <b>Fox Terrier (Wire/Wire-haired)</b> | 2 (1)            | 0                   | 0                  | 3 (1)              | 5     | 84.48           |
| <b>Airedale Terrier</b>               | 2 (1)            | 1                   | 0                  | 1 (1)              | 4     | 84.62           |
| <b>Border Terrier</b>                 | 1                | 2 (1)               | 0                  | 1 (1)              | 4     | 84.75           |
| <b>English Springer Spaniel</b>       | 1 (1)            | 1 (1)               | 0                  | 2 (2)              | 4     | 84.89           |
| Hokkaido Inu                          | 1                | 1                   | 0                  | 2                  | 4     | 85.02           |
| Irish Setter                          | 1                | 0                   | 1                  | 2                  | 4     | 85.16           |
| Kishu Inu                             | 0                | 2                   | 2                  | 0                  | 4     | 85.29           |
| Kooikwehondje                         | 1                | 3                   | 0                  | 0                  | 4     | 85.43           |
| Leonberger                            | 2                | 0                   | 0                  | 2                  | 4     | 85.56           |
| Norfolk Terrier                       | 0                | 1                   | 0                  | 3                  | 4     | 85.70           |
| <b>Samoyed</b>                        | 0                | 1 (1)               | 1                  | 2 (1)              | 4     | 85.84           |
| White Swiss Shepherd Dog              | 3                | 0                   | 1                  | 0                  | 4     | 85.97           |
| <b>Belgian Tervuren</b>               | 0                | 1 (1)               | 1 (1)              | 1                  | 3     | 86.07           |
| Bolognese                             | 0                | 1                   | 1                  | 1                  | 3     | 86.17           |
| <b>Borzoi</b>                         | 1 (1)            | 0                   | 1                  | 1 (1)              | 3     | 86.28           |
| <b>Brussels Griffon</b>               | 2 (1)            | 0                   | 0                  | 1 (1)              | 3     | 86.38           |
| <b>Bulldog</b>                        | 1                | 1 (1)               | 0                  | 1 (1)              | 3     | 86.48           |
| Collie (Rough)                        | 0                | 0                   | 2                  | 1                  | 3     | 86.58           |
| Japanese Chin                         | 0                | 3                   | 0                  | 0                  | 3     | 86.68           |
| <b>Manchester Terrier (toy)</b>       | 1 (1)            | 0                   | 1 (1)              | 1                  | 3     | 86.78           |

| Breed                        | Male<br>(intact) | Male<br>(castrated) | Female<br>(intact) | Female<br>(spayed) | Total       | Cumulative<br>% |
|------------------------------|------------------|---------------------|--------------------|--------------------|-------------|-----------------|
| Old English Sheepdog         | 2                | 1                   | 0                  | 0                  | 3           | 86.89           |
| <b>Australian Kelpie</b>     | 0                | 1 (1)               | 0                  | 1 (1)              | 2           | 86.95           |
| <b>Brittany</b>              | 0                | 1 (1)               | 0                  | 1 (1)              | 2           | 87.02           |
| Dachshund                    | 1                | 1                   | 0                  | 0                  | 2           | 87.09           |
| <b>Great Dane</b>            | 0                | 1 (1)               | 0                  | 1 (1)              | 2           | 87.16           |
| Great Pyrenees               | 0                | 0                   | 0                  | 2                  | 2           | 87.22           |
| <b>Lakeland Terrier</b>      | 1 (1)            | 0                   | 1 (1)              | 0                  | 2           | 87.29           |
| Norwich Terrier              | 0                | 2                   | 0                  | 0                  | 2           | 87.36           |
| Petit Basset Griffon Vendeen | 0                | 0                   | 0                  | 2                  | 2           | 87.43           |
| Scottish Terrier             | 0                | 0                   | 1                  | 1                  | 2           | 87.50           |
| Tibetan Spaniel              | 2                | 0                   | 0                  | 0                  | 2           | 87.56           |
| Weimaraner                   | 1                | 1                   | 0                  | 0                  | 2           | 87.63           |
| Afghan Hound                 | 0                | 0                   | 1                  | 0                  | 1           | 87.67           |
| American Terrier             | 0                | 1                   | 0                  | 0                  | 1           | 87.70           |
| Basset Hound                 | 0                | 0                   | 0                  | 1                  | 1           | 87.73           |
| Bearded Collie               | 0                | 0                   | 0                  | 1                  | 1           | 87.77           |
| Belgian Griffon              | 0                | 1                   | 0                  | 0                  | 1           | 87.80           |
| Belgian Malinois             | 1                | 0                   | 0                  | 0                  | 1           | 87.83           |
| Bouvier des Flandres         | 0                | 0                   | 0                  | 1                  | 1           | 87.87           |
| Bull Terrier                 | 1                | 0                   | 0                  | 0                  | 1           | 87.90           |
| Chinese Crested              | 1                | 0                   | 0                  | 0                  | 1           | 87.94           |
| Collie (Smooth)              | 0                | 0                   | 1                  | 0                  | 1           | 87.97           |
| Dogo Argentino               | 0                | 0                   | 1                  | 0                  | 1           | 88.00           |
| Fox Terrier                  | 0                | 0                   | 0                  | 1                  | 1           | 88.04           |
| German Shorthaired Pointer   | 0                | 0                   | 1                  | 0                  | 1           | 88.07           |
| Havanese                     | 0                | 0                   | 1                  | 0                  | 1           | 88.11           |
| Iceland Sheepdog             | 0                | 1                   | 0                  | 0                  | 1           | 88.14           |
| Japanese Terrier             | 0                | 0                   | 1                  | 0                  | 1           | 88.17           |
| Kawakami Inu                 | 0                | 0                   | 1                  | 0                  | 1           | 88.21           |
| Labradoodle                  | 0                | 1                   | 0                  | 0                  | 1           | 88.24           |
| Lhasa Apso                   | 0                | 0                   | 1                  | 0                  | 1           | 88.28           |
| Maremma Sheepdog             | 0                | 0                   | 0                  | 1                  | 1           | 88.31           |
| New Zealand Heading Dog      | 0                | 0                   | 0                  | 1                  | 1           | 88.34           |
| Petit Brabancon              | 0                | 0                   | 1                  | 0                  | 1           | 88.38           |
| Plott Hound                  | 1                | 0                   | 0                  | 0                  | 1           | 88.41           |
| Polish Lowland Sheepdog      | 1                | 0                   | 0                  | 0                  | 1           | 88.44           |
| Poodlepointer                | 0                | 1                   | 0                  | 0                  | 1           | 88.48           |
| Rottweiler                   | 0                | 1                   | 0                  | 0                  | 1           | 88.51           |
| Saluki                       | 0                | 1                   | 0                  | 0                  | 1           | 88.55           |
| Schipperke                   | 0                | 0                   | 0                  | 1                  | 1           | 88.58           |
| Shikoku Inu                  | 1                | 0                   | 0                  | 0                  | 1           | 88.61           |
| Spanish Water Dog            | 0                | 1                   | 0                  | 0                  | 1           | 88.65           |
| Tibetan Mastiff              | 1                | 0                   | 0                  | 0                  | 1           | 88.68           |
| Toy Fox Terrier              | 0                | 1                   | 0                  | 0                  | 1           | 88.72           |
| Vizsla                       | 0                | 1                   | 0                  | 0                  | 1           | 88.75           |
| White Shepherd Dog           | 0                | 0                   | 0                  | 1                  | 1           | 88.78           |
| Mixed Breed/Unknown          | 48               | 97                  | 50                 | 136                | 331         | 100.00          |
| <b>Total</b>                 | <b>608 (242)</b> | <b>900 (384)</b>    | <b>451 (203)</b>   | <b>992 (423)</b>   | <b>2951</b> |                 |

b. The United States

| Breed                            | Male<br>(intact) | Male<br>(castrated) | Female<br>(intact) | Female<br>(spayed) | Total | Cumulative<br>% |
|----------------------------------|------------------|---------------------|--------------------|--------------------|-------|-----------------|
| <b>Labrador Retriever</b>        | 52 (5)           | 267 (36)            | 40 (6)             | 259 (35)           | 618   | 5.95            |
| <b>German Shepherd</b>           | 69               | 149 (5)             | 65                 | 181 (5)            | 464   | 10.41           |
| <b>Golden Retriever</b>          | 42 (5)           | 132 (17)            | 39 (8)             | 120 (14)           | 333   | 13.62           |
| <b>Border Collie</b>             | 34 (6)           | 105 (31)            | 31 (8)             | 99 (29)            | 269   | 16.21           |
| Rottweiler                       | 51               | 85                  | 50                 | 79                 | 265   | 18.76           |
| <b>Australian Shepherd</b>       | 27 (1)           | 109 (2)             | 26 (1)             | 96 (2)             | 258   | 21.24           |
| <b>Doberman Pinscher</b>         | 49 (1)           | 57 (2)              | 38 (1)             | 69 (2)             | 213   | 23.29           |
| Soft Coated Wheaten Terrier      | 28               | 63                  | 30                 | 67                 | 188   | 25.10           |
| American Pit Bull Terrier        | 11               | 87                  | 10                 | 73                 | 181   | 26.85           |
| <b>Poodle (Standard)</b>         | 21 (2)           | 70 (4)              | 15 (1)             | 57 (3)             | 163   | 28.41           |
| Australian Cattle Dog            | 13               | 69                  | 10                 | 69                 | 161   | 29.96           |
| Collie                           | 35               | 38                  | 30                 | 32                 | 135   | 31.26           |
| Mastiff (English)                | 32               | 52                  | 24                 | 26                 | 134   | 32.55           |
| <b>Boxer</b>                     | 11 0             | 53 (2)              | 12 (1)             | 55 (1)             | 131   | 33.81           |
| <b>Bernese Mountain Dog</b>      | 17 (7)           | 49 (1)              | 25 (2)             | 34 (6)             | 125   | 35.02           |
| <b>Cocker Spaniel (American)</b> | 11 (4)           | 58 (3)              | 13 (2)             | 43 (5)             | 125   | 36.22           |
| <b>Jack Russell Terrier</b>      | 16 (6)           | 58 (23)             | 11 (5)             | 35 (24)            | 120   | 37.38           |
| <b>Chihuahua</b>                 | 5 (5)            | 50 (50)             | 11 (11)            | 45 (44)            | 111   | 38.44           |
| <b>Akita</b>                     | 27 (1)           | 34 (1)              | 15 (1)             | 31 (1)             | 107   | 39.47           |
| <b>Great Dane</b>                | 9                | 40 (1)              | 12                 | 40 (1)             | 101   | 40.45           |
| <b>Beagle</b>                    | 6 (4)            | 45 (17)             | 6 (5)              | 41 (16)            | 98    | 41.39           |
| <b>Siberian Husky</b>            | 15 (1)           | 37                  | 12                 | 28 (1)             | 92    | 42.28           |
| <b>Shetland Sheepdog</b>         | 7 (4)            | 44 (21)             | 9 (5)              | 31 (20)            | 91    | 43.15           |

| Breed                                 | Male<br>(intact) | Male<br>(castrated) | Female<br>(intact) | Female<br>(spayed) | Total | Cumulative<br>% |
|---------------------------------------|------------------|---------------------|--------------------|--------------------|-------|-----------------|
| Havanese                              | 11               | 35                  | 21                 | 20                 | 87    | 43.99           |
| Portuguese Water Dog                  | 13               | 23                  | 24                 | 26                 | 86    | 44.82           |
| Rhodesian Ridgeback                   | 24               | 22                  | 22                 | 15                 | 83    | 45.62           |
| <b>Bichon Frise</b>                   | 3                | 35 (5)              | 2                  | 42 (5)             | 82    | 46.40           |
| <b>Shiba Inu</b>                      | 12 (7)           | 38 (25)             | 10 (10)            | 22 (22)            | 82    | 47.19           |
| Dachshund                             | 7                | 40                  | 9                  | 19                 | 75    | 47.92           |
| <b>English Springer Spaniel</b>       | 13 (1)           | 29 (1)              | 10 (1)             | 22 (1)             | 74    | 48.63           |
| <b>Pomeranian</b>                     | 16 (8)           | 28 (17)             | 8 (8)              | 19 (17)            | 71    | 49.31           |
| <b>Airedale Terrier</b>               | 10 (1)           | 22                  | 8                  | 29 (1)             | 69    | 49.98           |
| Belgian Malinois                      | 15               | 17                  | 14                 | 23                 | 69    | 50.64           |
| Greyhound                             | 0                | 31                  | 0                  | 37                 | 68    | 51.29           |
| <b>Shih Tzu</b>                       | 5 (2)            | 24 (18)             | 6 (5)              | 28 (15)            | 63    | 51.90           |
| <b>Maltese</b>                        | 4 (4)            | 26 (12)             | 5 (3)              | 27 (13)            | 62    | 52.50           |
| <b>Miniature Schnauzer</b>            | 4 (3)            | 28 (27)             | 5 (5)              | 25 (25)            | 62    | 53.09           |
| <b>Belgian Tervuren</b>               | 22 (1)           | 11                  | 17                 | 8 (1)              | 58    | 53.65           |
| <b>Cocker Spaniel (English)</b>       | 18 (3)           | 10 (2)              | 18 (2)             | 12 (3)             | 58    | 54.21           |
| <b>Pug</b>                            | 2 (2)            | 28 (21)             | 2 (1)              | 25 (22)            | 57    | 54.76           |
| Weimaraner                            | 8                | 22                  | 9                  | 18                 | 57    | 55.31           |
| <b>Whippet</b>                        | 11 (1)           | 20 (2)              | 9 (1)              | 15 (2)             | 55    | 55.84           |
| <b>Brittany</b>                       | 2                | 28 (1)              | 4 (1)              | 19                 | 53    | 56.35           |
| Rat Terrier                           | 3                | 21                  | 10                 | 19                 | 53    | 56.86           |
| <b>Pembroke Welsh Corgi</b>           | 4 (3)            | 24 (21)             | 2 (2)              | 22 (22)            | 52    | 57.36           |
| <b>Yorkshire Terrier</b>              | 4 (4)            | 22 (19)             | 6 (4)              | 20 (19)            | 52    | 57.86           |
| Pit Bull                              | 5                | 19                  | 2                  | 25                 | 51    | 58.35           |
| American Staffordshire Terrier        | 5                | 22                  | 2                  | 21                 | 50    | 58.83           |
| <b>Dalmatian</b>                      | 13 (1)           | 16 (2)              | 6 (1)              | 15 (2)             | 50    | 59.31           |
| Chinook                               | 9                | 7                   | 20                 | 13                 | 49    | 59.78           |
| <b>Boston Terrier</b>                 | 3                | 27 (16)             | 1 (1)              | 16 (15)            | 47    | 60.24           |
| <b>Dachshund (Miniature)</b>          | 4 (3)            | 20 (18)             | 2 (2)              | 19 (19)            | 45    | 60.67           |
| <b>Cavalier King Charles Spaniel</b>  | 5 (2)            | 19 (16)             | 5 (4)              | 15 (14)            | 44    | 61.09           |
| <b>English Setter</b>                 | 13 (1)           | 11                  | 10 (1)             | 6                  | 40    | 61.48           |
| <b>West Highland White Terrier</b>    | 5 0              | 20 (5)              | 1                  | 14 (5)             | 40    | 61.86           |
| German Shorthaired Pointer            | 9                | 12                  | 2                  | 16                 | 39    | 62.24           |
| Eurasier                              | 11               | 5                   | 10                 | 12                 | 38    | 62.60           |
| Vizsla                                | 9                | 14                  | 7                  | 8                  | 38    | 62.97           |
| <b>Papillon</b>                       | 7 (3)            | 18 (9)              | 6 (6)              | 6 (6)              | 37    | 63.33           |
| <b>Poodle (Miniature)</b>             | 2                | 17 (6)              | 3 (2)              | 15 (4)             | 37    | 63.68           |
| Basset Hound                          | 3                | 19                  | 1                  | 12                 | 35    | 64.02           |
| Bullmastiff                           | 6                | 9                   | 7                  | 12                 | 34    | 64.35           |
| <b>Cairn Terrier</b>                  | 0                | 22 (2)              | 0                  | 11 (2)             | 33    | 64.66           |
| Great Pyrenees                        | 3                | 19                  | 0                  | 11                 | 33    | 64.98           |
| American Eskimo Dog                   | 0                | 19                  | 1                  | 12                 | 32    | 65.29           |
| Belgian Sheepdog                      | 7                | 10                  | 8                  | 6                  | 31    | 65.59           |
| Irish Setter                          | 18               | 3                   | 9                  | 1                  | 31    | 65.89           |
| <b>Miniature Pinscher</b>             | 4 (3)            | 14 (10)             | 4 (4)              | 9 (9)              | 31    | 66.19           |
| Saint Bernard                         | 5                | 13                  | 4                  | 9                  | 31    | 66.48           |
| Alaskan Malamute                      | 6                | 11                  | 0                  | 12                 | 29    | 66.76           |
| Lhasa Apso                            | 1                | 12                  | 0                  | 16                 | 29    | 67.04           |
| Irish Wolfhound                       | 13               | 9                   | 3                  | 3                  | 28    | 67.31           |
| <b>Flat-Coated Retriever</b>          | 3 (2)            | 7 (2)               | 8 (3)              | 9 (1)              | 27    | 67.57           |
| Alaskan Husky                         | 6                | 8                   | 3                  | 9                  | 26    | 67.82           |
| Chesapeake Bay Retriever              | 7                | 6                   | 2                  | 11                 | 26    | 68.07           |
| <b>Poodle (Toy)</b>                   | 3 (2)            | 12 (9)              | 1 (1)              | 10 (10)            | 26    | 68.32           |
| Redbone Coonhound                     | 1                | 11                  | 1                  | 13                 | 26    | 68.57           |
| Staffordshire Bull Terrier            | 2                | 5                   | 2                  | 17                 | 26    | 68.82           |
| American Bulldog                      | 3                | 14                  | 1                  | 7                  | 25    | 69.06           |
| <b>Border Terrier</b>                 | 5                | 9 (1)               | 4                  | 7 (1)              | 25    | 69.30           |
| Bouvier des Flandres                  | 7                | 8                   | 3                  | 7                  | 25    | 69.54           |
| Nova Scotia Duck Tolling Retriever    | 6                | 7                   | 5                  | 6                  | 24    | 69.78           |
| Chinese Shar-Pei                      | 3                | 10                  | 1                  | 9                  | 23    | 70.00           |
| <b>Australian Kelpie</b>              | 6 (1)            | 5                   | 1                  | 10 (1)             | 22    | 70.21           |
| <b>Borzoi</b>                         | 10 (1)           | 3                   | 6 (1)              | 2                  | 21    | 70.41           |
| <b>Bulldog</b>                        | 3 (1)            | 4                   | 4 (1)              | 10                 | 21    | 70.61           |
| Newfoundland                          | 2                | 7                   | 4                  | 8                  | 21    | 70.82           |
| Afghan Hound                          | 6                | 1                   | 9                  | 3                  | 19    | 71.00           |
| <b>Fox Terrier (Wire/Wire-haired)</b> | 1                | 10 (1)              | 2                  | 5 (1)              | 18    | 71.17           |
| <b>French Bulldog</b>                 | 0                | 9 (9)               | 2 (2)              | 7 (7)              | 18    | 71.34           |
| <b>Italian Greyhound</b>              | 3 (3)            | 6 (6)               | 3 (3)              | 6 (6)              | 18    | 71.52           |
| Treeing Walker Coonhound              | 1                | 10                  | 0                  | 7                  | 18    | 71.69           |
| Black and Tan Coonhound               | 2                | 5                   | 3                  | 7                  | 17    | 71.85           |
| Chinese Crested                       | 3                | 7                   | 2                  | 5                  | 17    | 72.02           |
| English Bulldog                       | 2                | 6                   | 0                  | 9                  | 17    | 72.18           |
| Norwegian Elkhound                    | 2                | 5                   | 1                  | 9                  | 17    | 72.35           |
| <b>Basenji</b>                        | 2 (1)            | 8 (1)               | 1 (1)              | 5 (1)              | 16    | 72.50           |
| German Wirehaired Pointer             | 2                | 5                   | 3                  | 5                  | 15    | 72.64           |

| Breed                           | Male<br>(intact) | Male<br>(castrated) | Female<br>(intact) | Female<br>(spayed) | Total | Cumulative<br>% |
|---------------------------------|------------------|---------------------|--------------------|--------------------|-------|-----------------|
| Kuvasz                          | 4                | 5                   | 5                  | 1                  | 15    | 72.79           |
| <b>Pekingese</b>                | 1 (1)            | 8 (3)               | 0                  | 6 (4)              | 15    | 72.93           |
| Chow Chow                       | 6                | 2                   | 2                  | 4                  | 14    | 73.07           |
| Scottish Terrier                | 4                | 6                   | 2                  | 2                  | 14    | 73.20           |
| Anatolian Shepherd              | 0                | 8                   | 1                  | 4                  | 13    | 73.33           |
| Cane Corso                      | 1                | 2                   | 3                  | 7                  | 13    | 73.45           |
| Cardigan Welsh Corgi            | 2                | 5                   | 2                  | 4                  | 13    | 73.58           |
| Gordon Setter                   | 5                | 2                   | 6                  | 0                  | 13    | 73.70           |
| Husky Mix                       | 1                | 7                   | 0                  | 5                  | 13    | 73.83           |
| Parson Russell Terrier          | 1                | 7                   | 2                  | 3                  | 13    | 73.95           |
| <b>Pointer</b>                  | 2                | 6 (2)               | 1                  | 4 (2)              | 13    | 74.08           |
| Schipperke                      | 2                | 5                   | 2                  | 4                  | 13    | 74.20           |
| Bearded Collie                  | 2                | 6                   | 1                  | 3                  | 12    | 74.32           |
| Collie (Rough)                  | 2                | 5                   | 1                  | 4                  | 12    | 74.43           |
| Giant Schnauzer                 | 2                | 3                   | 2                  | 5                  | 12    | 74.55           |
| <b>Samoyed</b>                  | 1                | 3 (1)               | 3 (1)              | 5                  | 12    | 74.67           |
| Tibetan Terrier                 | 2                | 3                   | 4                  | 3                  | 12    | 74.78           |
| Lagotto Romagnolo               | 5                | 0                   | 4                  | 2                  | 11    | 74.89           |
| Old English Sheepdog            | 0                | 9                   | 0                  | 2                  | 11    | 74.99           |
| Plott                           | 0                | 7                   | 0                  | 4                  | 11    | 75.10           |
| American Foxhound               | 0                | 1                   | 0                  | 9                  | 10    | 75.19           |
| Fox Terrier (Toy)               | 0                | 4                   | 1                  | 5                  | 10    | 75.29           |
| Ibizan Hound                    | 4                | 1                   | 2                  | 3                  | 10    | 75.39           |
| Irish Water Spaniel             | 5                | 1                   | 4                  | 0                  | 10    | 75.48           |
| Keeshond                        | 2                | 5                   | 0                  | 3                  | 10    | 75.58           |
| Silky Terrier                   | 0                | 4                   | 2                  | 4                  | 10    | 75.68           |
| Welsh Terrier                   | 0                | 6                   | 2                  | 2                  | 10    | 75.77           |
| Collie (Smooth)                 | 0                | 5                   | 1                  | 3                  | 9     | 75.86           |
| Blue Heeler                     | 1                | 2                   | 1                  | 4                  | 8     | 75.94           |
| Bull Terrier                    | 0                | 5                   | 1                  | 2                  | 8     | 76.01           |
| Fox Terrier (Smooth)            | 2                | 3                   | 0                  | 3                  | 8     | 76.09           |
| Standard Schnauzer              | 1                | 4                   | 0                  | 3                  | 8     | 76.17           |
| Blue Tick Coonhound             | 0                | 5                   | 1                  | 1                  | 7     | 76.23           |
| <b>Brussels Griffon</b>         | 0                | 4 (1)               | 1 (1)              | 2                  | 7     | 76.30           |
| Lurcher                         | 1                | 4                   | 0                  | 2                  | 7     | 76.37           |
| Black Russian Terrier           | 2                | 2                   | 0                  | 2                  | 6     | 76.43           |
| Irish Terrier                   | 3                | 1                   | 0                  | 2                  | 6     | 76.48           |
| Jindo                           | 1                | 3                   | 0                  | 2                  | 6     | 76.54           |
| Kerry Blue Terrier              | 2                | 2                   | 1                  | 1                  | 6     | 76.60           |
| Norwich Terrier                 | 0                | 3                   | 2                  | 1                  | 6     | 76.66           |
| Spanish Water Dog               | 2                | 1                   | 1                  | 2                  | 6     | 76.72           |
| Sussex Spaniel                  | 1                | 3                   | 2                  | 0                  | 6     | 76.77           |
| Welsh Springer Spaniel          | 2                | 3                   | 1                  | 0                  | 6     | 76.83           |
| American Boxer                  | 1                | 1                   | 0                  | 3                  | 5     | 76.88           |
| Australian Silky Terrier        | 0                | 4                   | 0                  | 1                  | 5     | 76.93           |
| Australian Terrier              | 1                | 3                   | 0                  | 1                  | 5     | 76.98           |
| Briard                          | 0                | 1                   | 3                  | 1                  | 5     | 77.02           |
| Greater Swiss Mountain Dog      | 0                | 2                   | 1                  | 2                  | 5     | 77.07           |
| Irish Red and White Setter      | 3                | 0                   | 1                  | 1                  | 5     | 77.12           |
| Neapolitan Mastiff              | 0                | 2                   | 0                  | 3                  | 5     | 77.17           |
| Polish Lowland Sheepdog         | 1                | 4                   | 0                  | 0                  | 5     | 77.22           |
| Saluki                          | 2                | 2                   | 1                  | 0                  | 5     | 77.26           |
| Affenpinscher                   | 0                | 3                   | 0                  | 1                  | 4     | 77.30           |
| Clumber Spaniel                 | 1                | 3                   | 0                  | 0                  | 4     | 77.34           |
| Eurohound Husky                 | 1                | 1                   | 2                  | 0                  | 4     | 77.38           |
| Japanese Chin                   | 0                | 1                   | 0                  | 3                  | 4     | 77.42           |
| <b>Manchester Terrier (Toy)</b> | 0                | 1 (1)               | 0                  | 3 (1)              | 4     | 77.46           |
| Pharaoh Hound                   | 1                | 2                   | 0                  | 1                  | 4     | 77.50           |
| <b>Belgian Groenendal</b>       | 1                | 1 (1)               | 0                  | 1 (1)              | 3     | 77.52           |
| Dogo Argentino                  | 1                | 1                   | 0                  | 1                  | 3     | 77.55           |
| Lowchen                         | 1                | 2                   | 0                  | 0                  | 3     | 77.58           |
| Manchester Terrier              | 0                | 1                   | 0                  | 2                  | 3     | 77.61           |
| Miniature Bull Terrier          | 1                | 0                   | 0                  | 2                  | 3     | 77.64           |
| Shiloh Shepherd                 | 0                | 0                   | 0                  | 3                  | 3     | 77.67           |
| WGSD                            | 0                | 2                   | 1                  | 0                  | 3     | 77.70           |
| American Water Spaniel          | 0                | 0                   | 1                  | 1                  | 2     | 77.72           |
| Bedlington Terrier              | 1                | 0                   | 1                  | 0                  | 2     | 77.74           |
| Bracco Italiano                 | 0                | 0                   | 0                  | 2                  | 2     | 77.76           |
| Curly-Coated Retriever          | 2                | 0                   | 0                  | 0                  | 2     | 77.77           |
| English Foxhound                | 0                | 1                   | 0                  | 1                  | 2     | 77.79           |
| Field Spaniel                   | 1                | 0                   | 0                  | 1                  | 2     | 77.81           |
| King Shepherd                   | 0                | 2                   | 0                  | 0                  | 2     | 77.83           |
| <b>Lakeland Terrier</b>         | 0                | 1 (1)               | 1 (1)              | 0                  | 2     | 77.85           |
| Mudi                            | 0                | 0                   | 2                  | 0                  | 2     | 77.87           |
| Petit Basset Griffon Vendeen    | 1                | 1                   | 0                  | 0                  | 2     | 77.89           |

| Breed                       | Male<br>(intact)  | Male<br>(castrated) | Female<br>(intact) | Female<br>(spayed) | Total        | Cumulative<br>% |
|-----------------------------|-------------------|---------------------|--------------------|--------------------|--------------|-----------------|
| Scottish Deerhound          | 0                 | 0                   | 1                  | 1                  | 2            | 77.91           |
| Silken Windhound            | 1                 | 0                   | 1                  | 0                  | 2            | 77.93           |
| Spinone Italiano            | 1                 | 1                   | 0                  | 0                  | 2            | 77.95           |
| Stabyhoun                   | 0                 | 0                   | 2                  | 0                  | 2            | 77.97           |
| Tibetan Spaniel             | 0                 | 0                   | 1                  | 1                  | 2            | 77.99           |
| Wirehaired Pointing Griffon | 0                 | 0                   | 0                  | 2                  | 2            | 78.01           |
| Beauceron                   | 0                 | 0                   | 1                  | 0                  | 1            | 78.02           |
| Bloodhound                  | 0                 | 0                   | 0                  | 1                  | 1            | 78.02           |
| English Coonhound           | 0                 | 0                   | 0                  | 1                  | 1            | 78.03           |
| German Pinscher             | 0                 | 0                   | 1                  | 0                  | 1            | 78.04           |
| Icelandic Sheepdog          | 0                 | 1                   | 0                  | 0                  | 1            | 78.05           |
| Komondor                    | 1                 | 0                   | 0                  | 0                  | 1            | 78.06           |
| Lancashire Heeler           | 1                 | 0                   | 0                  | 0                  | 1            | 78.07           |
| Otterhound                  | 1                 | 0                   | 0                  | 0                  | 1            | 78.08           |
| Peruvian Inca Orchid        | 0                 | 0                   | 0                  | 1                  | 1            | 78.09           |
| Portuguese Podengo          | 1                 | 0                   | 0                  | 0                  | 1            | 78.10           |
| Puli                        | 0                 | 0                   | 1                  | 0                  | 1            | 78.11           |
| Sloughi                     | 1                 | 0                   | 0                  | 0                  | 1            | 78.12           |
| Swiss Mountain Dog          | 0                 | 0                   | 1                  | 0                  | 1            | 78.13           |
| Teddy Roosevelt Terriers    | 0                 | 0                   | 1                  | 0                  | 1            | 78.14           |
| Tosa                        | 0                 | 1                   | 0                  | 0                  | 1            | 78.15           |
| Mixed Breed/Unknown         | 71                | 1077                | 55                 | 1067               | 2270         | 100.00          |
| <b>Total</b>                | <b>1226 (117)</b> | <b>4203 (510)</b>   | <b>1084 (136)</b>  | <b>3876 (489)</b>  | <b>10389</b> |                 |

The breeds written in bold letters were selected for the factor analysis. The numbers of selected dogs are shown in parentheses.

The shaded regions indicated the breeds accounted for 50% of all dogs in each country.
