# Supplementary material for: Comparison of owner-reported behavioral characteristics among genetically clustered breeds of dog (Canis familiaris)
Source: PubMed Central journal article supplement (PMC4683527; doi:10.1038/srep17710), 2015-12-18
Supplement: srep17710-s5.pdf [file srep17710-s5.pdf]

Supplementary Table 2 The results for analysis of factor scores using generalized linear models.

|                                        | F1: Aggression to unfamiliar persons |    |       |                     |                 |          |    |       |                     |                 | F2: Fear of unfamiliar persons |    |       |                     |   |          |    |       |                     |        |
|----------------------------------------|--------------------------------------|----|-------|---------------------|-----------------|----------|----|-------|---------------------|-----------------|--------------------------------|----|-------|---------------------|---|----------|----|-------|---------------------|--------|
|                                        | JPN                                  |    |       |                     |                 | US       |    |       |                     |                 | JPN                            |    |       |                     |   | US       |    |       |                     |        |
|                                        | $\chi^2$                             | df | p     | Pairwise comparison | B <sup>5)</sup> | $\chi^2$ | df | p     | Pairwise comparison | B <sup>5)</sup> | $\chi^2$                       | df | p     | Pairwise comparison | B | $\chi^2$ | df | p     | Pairwise comparison | B      |
| Breed groups <sup>1)</sup>             | 35.683                               | 7  | 0.000 | 2>7, 2>8, 3>8       |                 | 22.108   | 7  | 0.015 | 2>7, 3>7            |                 | 6.002                          | 7  | 0.540 |                     |   | 11.446   | 7  | 0.120 |                     |        |
| Sex                                    | 9.500                                | 1  | 0.002 | 1>2                 |                 | 2.006    | 1  | 0.157 |                     |                 | 10.172                         | 1  | 0.001 | 1<2                 |   | 0.923    | 1  | 0.337 |                     |        |
| Neutered status <sup>2)</sup>          | 0.540                                | 1  | 0.462 |                     |                 | 0.034    | 1  | 0.854 |                     |                 | 0.004                          | 1  | 0.948 |                     |   | 1.303    | 1  | 0.254 |                     |        |
| Source where aquired <sup>3)</sup>     | 16.956                               | 6  | 0.009 |                     |                 | 14.593   | 6  | 0.024 |                     |                 | 2.180                          | 6  | 0.902 |                     |   | 1.533    | 6  | 0.957 |                     |        |
| Dog-ownership experience <sup>4)</sup> | 0.330                                | 1  | 0.566 |                     |                 | 2.577    | 1  | 0.108 |                     |                 | 0.784                          | 1  | 0.376 |                     |   | 0.054    | 1  | 0.816 |                     |        |
| Body weight                            | 0.499                                | 1  | 0.480 |                     |                 | 0.251    | 1  | 0.616 |                     |                 | 5.620                          | 1  | 0.018 | -0.036              |   | 7.809    | 1  | 0.005 |                     | -0.024 |
| Dog's age at evaluation                | 2.654                                | 1  | 0.103 |                     |                 | 2.222    | 1  | 0.136 |                     |                 | 0.696                          | 1  | 0.404 |                     |   | 4.743    | 1  | 0.029 |                     | -0.059 |
| Dog's age when acquired                | 5.244                                | 1  | 0.022 |                     | -0.004          | 7.269    | 1  | 0.007 |                     | 0.007           | 0.020                          | 1  | 0.887 |                     |   | 5.806    | 1  | 0.016 |                     | 0.002  |
| Breed groups*Sex                       | 9.753                                | 7  | 0.203 |                     |                 | 7.399    | 7  | 0.389 |                     |                 | 6.224                          | 6  | 0.399 |                     |   | 3.421    | 7  | 0.843 |                     |        |
| Omnibus                                | 106.055                              | 26 | 0.000 |                     |                 | 85.286   | 26 | 0.000 |                     |                 | 46.087                         | 26 | 0.009 |                     |   | 83.530   | 26 | 0.000 |                     |        |

  

|                                        | F3: Trainability |    |       |                     |       |          |    |       |                     |        | F4: Separation-related anxiety |    |       |                     |                 |          |    |       |                     |                 |
|----------------------------------------|------------------|----|-------|---------------------|-------|----------|----|-------|---------------------|--------|--------------------------------|----|-------|---------------------|-----------------|----------|----|-------|---------------------|-----------------|
|                                        | JPN              |    |       |                     |       | US       |    |       |                     |        | JPN                            |    |       |                     |                 | US       |    |       |                     |                 |
|                                        | $\chi^2$         | df | p     | Pairwise comparison | B     | $\chi^2$ | df | p     | Pairwise comparison | B      | $\chi^2$                       | df | p     | Pairwise comparison | B <sup>5)</sup> | $\chi^2$ | df | p     | Pairwise comparison | B <sup>5)</sup> |
| Breed groups <sup>1)</sup>             | 36.607           | 7  | 0.000 | 1<6, 3<6, 5<6       |       | 20.077   | 7  | 0.005 | 1<6, 5<6            |        | 7.479                          | 7  | 0.381 |                     |                 | 12.672   | 7  | 0.081 |                     |                 |
| Sex                                    | 0.566            | 1  | 0.452 |                     |       | 0.067    | 1  | 0.796 |                     |        | 0.277                          | 1  | 0.599 |                     |                 | 0.020    | 1  | 0.888 |                     |                 |
| Neutered status <sup>2)</sup>          | 6.678            | 1  | 0.010 | 1>2                 |       | 0.682    | 1  | 0.409 |                     |        | 12.346                         | 1  | 0.000 | 1<2                 |                 | 0.091    | 1  | 0.763 |                     |                 |
| Source where aquired <sup>3)</sup>     | 15.233           | 6  | 0.019 | 3>4                 |       | 15.166   | 6  | 0.019 | 4>7                 |        | 12.936                         | 6  | 0.044 |                     |                 | 9.287    | 6  | 0.158 |                     |                 |
| Dog-ownership experience <sup>4)</sup> | 4.569            | 1  | 0.033 | 1<2                 |       | 14.238   | 1  | 0.000 | 1<2                 |        | 1.074                          | 1  | 0.300 |                     |                 | 12.463   | 1  | 0.000 | 1>2                 |                 |
| Body weight                            | 1.080            | 1  | 0.299 |                     |       | 3.634    | 1  | 0.057 |                     |        | 0.831                          | 1  | 0.362 |                     |                 | 3.869    | 1  | 0.049 |                     | -0.013          |
| Dog's age at evaluation                | 13.250           | 1  | 0.000 |                     | 0.034 | 13.008   | 1  | 0.000 |                     | 0.019  | 1.895                          | 1  | 0.169 |                     |                 | 5.225    | 1  | 0.022 |                     | -0.048          |
| Dog's age when acquired                | 0.342            | 1  | 0.559 |                     |       | 7.406    | 1  | 0.006 |                     | -0.001 | 0.200                          | 1  | 0.654 |                     |                 | 0.616    | 1  | 0.433 |                     |                 |
| Breed groups*Sex                       | 6.006            | 7  | 0.539 |                     |       | 2.581    | 7  | 0.921 |                     |        | 5.917                          | 7  | 0.549 |                     |                 | 2.020    | 7  | 0.959 |                     |                 |
| Omnibus                                | 102.518          | 26 | 0.000 |                     |       | 117.931  | 26 | 0.000 |                     |        | 51.301                         | 26 | 0.002 |                     |                 | 83.212   | 26 | 0.000 |                     |                 |

  

|                                        | F5: Energy and restless |    |       |                     |   |          |    |       |                     |        | F6: Fear of non-social stimuli |    |       |                     |   |          |    |       |                     |        |
|----------------------------------------|-------------------------|----|-------|---------------------|---|----------|----|-------|---------------------|--------|--------------------------------|----|-------|---------------------|---|----------|----|-------|---------------------|--------|
|                                        | JPN                     |    |       |                     |   | US       |    |       |                     |        | JPN                            |    |       |                     |   | US       |    |       |                     |        |
|                                        | $\chi^2$                | df | p     | Pairwise comparison | B | $\chi^2$ | df | p     | Pairwise comparison | B      | $\chi^2$                       | df | p     | Pairwise comparison | B | $\chi^2$ | df | p     | Pairwise comparison | B      |
| Breed groups <sup>1)</sup>             | 18.468                  | 7  | 0.010 | 4<6                 |   | 19.264   | 7  | 0.007 | 1>4, 4<6            |        | 18.468                         | 7  | 0.010 | 4<6                 |   | 19.264   | 7  | 0.007 | 1>4, 4<6            |        |
| Sex                                    | 0.386                   | 1  | 0.534 |                     |   | 0.006    | 1  | 0.937 |                     |        | 0.386                          | 1  | 0.534 |                     |   | 0.006    | 1  | 0.937 |                     |        |
| Neutered status <sup>2)</sup>          | 1.344                   | 1  | 0.246 |                     |   | 4.358    | 1  | 0.037 | 1>2                 |        | 1.344                          | 1  | 0.246 |                     |   | 4.358    | 1  | 0.037 | 1>2                 |        |
| Source where aquired <sup>3)</sup>     | 4.287                   | 6  | 0.638 |                     |   | 6.516    | 6  | 0.368 |                     |        | 4.287                          | 6  | 0.638 |                     |   | 6.516    | 6  | 0.368 |                     |        |
| Dog-ownership experience <sup>4)</sup> | 2.869                   | 1  | 0.090 | 1<2                 |   | 5.462    | 1  | 0.019 | 1<2                 |        | 2.869                          | 1  | 0.090 |                     |   | 5.462    | 1  | 0.019 | 1>2                 |        |
| Body weight                            | 1.980                   | 1  | 0.159 |                     |   | 6.001    | 1  | 0.014 |                     | -0.013 | 1.980                          | 1  | 0.159 |                     |   | 6.001    | 1  | 0.014 |                     | -0.013 |
| Dog's age at evaluation                | 2.532                   | 1  | 0.112 |                     |   | 0.077    | 1  | 0.782 |                     |        | 2.532                          | 1  | 0.112 |                     |   | 0.077    | 1  | 0.782 |                     |        |
| Dog's age when acquired                | 0.267                   | 1  | 0.605 |                     |   | 7.783    | 1  | 0.005 |                     | 0.001  | 0.267                          | 1  | 0.605 |                     |   | 7.783    | 1  | 0.005 |                     | 0.001  |
| Breed groups*Sex                       | 2.190                   | 7  | 0.949 |                     |   | 6.547    | 7  | 0.477 |                     |        | 2.190                          | 7  | 0.949 |                     |   | 6.547    | 7  | 0.477 |                     |        |
| Omnibus                                | 52.994                  | 26 | 0.001 |                     |   | 86.367   | 26 | 0.000 |                     |        | 52.994                         | 26 | 0.001 |                     |   | 86.367   | 26 | 0.000 |                     |        |

|                                        | F7: Aggression to household members |    |       |                     |                 |          |    |       |                     |                 | F8: Fear of unfamiliar dogs |    |       |                     |   |          |    |       |                     |   |
|----------------------------------------|-------------------------------------|----|-------|---------------------|-----------------|----------|----|-------|---------------------|-----------------|-----------------------------|----|-------|---------------------|---|----------|----|-------|---------------------|---|
|                                        | JPN                                 |    |       |                     |                 | US       |    |       |                     |                 | JPN                         |    |       |                     |   | US       |    |       |                     |   |
|                                        | $\chi^2$                            | df | p     | Pairwise comparison | B <sup>5)</sup> | $\chi^2$ | df | p     | Pairwise comparison | B <sup>5)</sup> | $\chi^2$                    | df | p     | Pairwise comparison | B | $\chi^2$ | df | p     | Pairwise comparison | B |
| Breed groups <sup>1)</sup>             | 26.656                              | 7  | 0.000 | 2>4, 3>4, 4<6       |                 | 12.400   | 6  | 0.054 |                     |                 | 9.250                       | 7  | 0.235 |                     |   | 5.621    | 7  | 0.585 |                     |   |
| Sex                                    | 4.384                               | 1  | 0.036 | 1<2                 |                 | 0.092    | 1  | 0.761 |                     |                 | 14.742                      | 1  | 0.000 | 1<2                 |   | 0.265    | 1  | 0.606 |                     |   |
| Neutered status <sup>2)</sup>          | 3.107                               | 1  | 0.078 |                     |                 | 0.084    | 1  | 0.772 |                     |                 | 0.527                       | 1  | 0.468 |                     |   | 3.157    | 1  | 0.076 |                     |   |
| Source where aquired <sup>3)</sup>     | 18.959                              | 6  | 0.004 |                     |                 | 15.458   | 6  | 0.017 |                     |                 | 6.152                       | 6  | 0.406 |                     |   | 7.615    | 6  | 0.268 |                     |   |
| Dog-ownership experience <sup>4)</sup> | 0.046                               | 1  | 0.830 |                     |                 | 8.267    | 1  | 0.004 |                     |                 | 0.314                       | 1  | 0.575 |                     |   | 1.955    | 1  | 0.162 |                     |   |
| Body weight                            | 0.011                               | 1  | 0.918 |                     |                 | 0.053    | 1  | 0.818 |                     |                 | 3.181                       | 1  | 0.075 |                     |   | 2.094    | 1  | 0.148 |                     |   |
| Dog's age at evaluation                | 0.152                               | 1  | 0.697 |                     |                 | 0.044    | 1  | 0.833 |                     |                 | 0.261                       | 1  | 0.609 |                     |   | 1.152    | 1  | 0.283 |                     |   |
| Dog's age when acquired                | 0.130                               | 1  | 0.718 |                     |                 | 2.596    | 1  | 0.107 |                     |                 | 0.018                       | 1  | 0.895 |                     |   | 0.039    | 1  | 0.843 |                     |   |
| Breed groups*Sex                       | 4.039                               | 6  | 0.671 |                     |                 | 11.672   | 6  | 0.070 |                     |                 | 3.663                       | 6  | 0.722 |                     |   | 4.145    | 7  | 0.763 |                     |   |
| Omnibus                                | 108.389                             | 26 | 0.000 |                     |                 | 74.940   | 26 | 0.000 |                     |                 | 59.261                      | 26 | 0.000 |                     |   | 50.826   | 26 | 0.003 |                     |   |

|                                        | F9: Aggression to unfamiliar dogs |    |       |                     |       |          |    |       |                     |   | F11: Attachment and attention-seeking |    |       |                                 |                 |          |    |       |                     |                 |
|----------------------------------------|-----------------------------------|----|-------|---------------------|-------|----------|----|-------|---------------------|---|---------------------------------------|----|-------|---------------------------------|-----------------|----------|----|-------|---------------------|-----------------|
|                                        | JPN                               |    |       |                     |       | US       |    |       |                     |   | JPN                                   |    |       |                                 |                 | US       |    |       |                     |                 |
|                                        | $\chi^2$                          | df | p     | Pairwise comparison | B     | $\chi^2$ | df | p     | Pairwise comparison | B | $\chi^2$                              | df | p     | Pairwise comparison             | B <sup>5)</sup> | $\chi^2$ | df | p     | Pairwise comparison | B <sup>5)</sup> |
| Breed groups <sup>1)</sup>             | 14.222                            | 7  | 0.047 |                     |       | 18.066   | 7  | 0.012 |                     |   | 55.460                                | 7  | 0.000 | 1<2, 1<3, 1<5, 1<6,<br>1<7, 1<8 |                 | 35.350   | 7  | 0.000 | 1<2, 1<3, 1<5       |                 |
| Sex                                    | 4.083                             | 1  | 0.043 |                     |       | 0.717    | 1  | 0.397 |                     |   | 6.927                                 | 1  | 0.008 | 1>2                             |                 | 0.302    | 1  | 0.583 |                     |                 |
| Neutered status <sup>2)</sup>          | 1.623                             | 1  | 0.203 |                     |       | 0.184    | 1  | 0.668 |                     |   | 2.800                                 | 1  | 0.094 |                                 |                 | 0.017    | 1  | 0.895 |                     |                 |
| Source where aquired <sup>3)</sup>     | 8.789                             | 6  | 0.186 |                     |       | 9.291    | 6  | 0.158 |                     |   | 10.261                                | 6  | 0.114 |                                 |                 | 8.593    | 6  | 0.198 |                     |                 |
| Dog-ownership experience <sup>4)</sup> | 1.935                             | 1  | 0.164 |                     |       | 3.048    | 1  | 0.081 |                     |   | 0.675                                 | 1  | 0.411 |                                 |                 | 0.002    | 1  | 0.966 |                     |                 |
| Body weight                            | 3.593                             | 1  | 0.058 |                     |       | 0.008    | 1  | 0.928 |                     |   | 8.240                                 | 1  | 0.004 |                                 | -0.009          | 1.112    | 1  | 0.292 |                     |                 |
| Dog's age at evaluation                | 14.776                            | 1  | 0.000 |                     | 0.106 | 2.985    | 1  | 0.084 |                     |   | 6.427                                 | 1  | 0.011 |                                 | -0.021          | 6.039    | 1  | 0.014 |                     | -0.017          |
| Dog's age when acquired                | 1.898                             | 1  | 0.168 |                     |       | 0.655    | 1  | 0.418 |                     |   | 1.239                                 | 1  | 0.266 |                                 |                 | 0.487    | 1  | 0.485 |                     |                 |
| Breed groups*Sex                       | 6.497                             | 7  | 0.483 |                     |       | 3.209    | 7  | 0.865 |                     |   | 3.815                                 | 7  | 0.801 |                                 |                 | 6.484    | 7  | 0.484 |                     |                 |
| Omnibus                                | 60.411                            | 26 | 0.000 |                     |       | 54.225   | 26 | 0.001 |                     |   | 84.440                                | 26 | 0.000 |                                 |                 | 72.306   | 26 | 0.000 |                     |                 |

|                                        | F12: Aggression to persons passing near the house |    |       |                     |   |          |    |       |                     |        |
|----------------------------------------|---------------------------------------------------|----|-------|---------------------|---|----------|----|-------|---------------------|--------|
|                                        | JPN                                               |    |       |                     |   | US       |    |       |                     |        |
|                                        | $\chi^2$                                          | df | p     | Pairwise comparison | B | $\chi^2$ | df | p     | Pairwise comparison | B      |
| Breed groups <sup>1)</sup>             | 13.540                                            | 7  | 0.060 |                     |   | 7.043    | 7  | 0.424 |                     |        |
| Sex                                    | 2.484                                             | 1  | 0.115 |                     |   | 0.321    | 1  | 0.571 |                     |        |
| Neutered status <sup>2)</sup>          | 0.857                                             | 1  | 0.354 |                     |   | 0.006    | 1  | 0.940 |                     |        |
| Source where aquired <sup>3)</sup>     | 4.902                                             | 6  | 0.556 |                     |   | 6.490    | 6  | 0.371 |                     |        |
| Dog-ownership experience <sup>4)</sup> | 0.180                                             | 1  | 0.671 |                     |   | 0.595    | 1  | 0.441 |                     |        |
| Body weight                            | 0.316                                             | 1  | 0.574 |                     |   | 0.136    | 1  | 0.713 |                     |        |
| Dog's age at evaluation                | 0.167                                             | 1  | 0.682 |                     |   | 0.248    | 1  | 0.619 |                     |        |
| Dog's age when acquired                | 0.969                                             | 1  | 0.325 |                     |   | 7.009    | 1  | 0.008 |                     | -0.002 |
| Breed groups*Sex                       | 8.211                                             | 7  | 0.314 |                     |   | 0.693    | 7  | 0.998 |                     |        |
| Omnibus                                | 37.725                                            | 26 | 0.064 |                     |   | 35.618   | 26 | 0.099 |                     |        |

1) Ancient and spitz breeds: 1, Toy dogs: 2, Spaniels, scent hounds, and poodles: 3, Working dogs: 4, Small terriers: 5, Sight hounds and herding dogs: 6, Retrievers: 7, Mastiff-like dogs: 8

2) neutered: N, intact: I

3) bred by owner: 1, friend of relative: 2, breeder: 3, pet store: 4, shelter: 5, stray: 6, other: 7

4) first ownership: 1, second and more ownership: 2

5) partial regression coefficient
