# Supplementary material for: Comparison of owner-reported behavioral characteristics among genetically clustered breeds of dog (Canis familiaris)
Source: PubMed Central journal article supplement (PMC4683527; doi:10.1038/srep17710), 2015-12-18
Supplement: srep17710-s6.pdf [file srep17710-s6.pdf]

Comparison of owner-reported behavioral characteristics among genetically clustered breeds of dog (*Canis familiaris*).

Akiko Tonoike, Miho Nagasawa, Kazutaka Mogi, James A. Serpell, Hisashi Ohtsuki, Takefumi Kikusui

## **Supplementary figure legends**

Supplementary Figure 1. The breed tree of the cladistic analysis for Factor 11 (Attachment and attention-seeking).

Supplementary Figure 2. The breed tree of the cladistic analysis for Factor 4 (Separation-related anxiety).

Supplementary Figure 3. The breed tree of the cladistic analysis for Factor 2 (Fear of unfamiliar persons).
